# Supplementary material for: An integrated molecular–thermodynamic framework for analyzing nanobubbles in supersaturated liquids
Source: Royal Society of Chemistry journal article supplement (doi:10.1039/d5ra07908j), 2025-01-01
Supplement: d5ra07908j1.pdf [file d5ra07908j1.pdf]

# An Integrated Molecular–Thermodynamic Framework for Analyzing Nanobubbles in Supersaturated Liquids

Received 00th January 20xx,  
Accepted 00th January 20xx

Ali Ghamartale <sup>a</sup>, Ehsan Shahini <sup>a</sup>, Aditya Jain <sup>b</sup>, Rogerio Manica <sup>c</sup>, Peter Berg <sup>d</sup>, Tian Tang, <sup>\*a</sup>

DOI: 10.1039/x0xx00000x

## Electronic Supplementary Information

### Forcefield Verification Using Nanobubble Density Analysis

To verify the compatibility of the selected forcefields for hydrogen and water, we compared the nanobubble density obtained from MD simulations ( $n_{gB}M_g/V_{gB}$ ) with the hydrogen density calculated from NIST data, using the corresponding bubble pressure and temperature. Figure S-1 illustrates the comparison for the systems S4 and L5. The densities from MD simulations align closely with the NIST estimates, falling along the 45-degree line. These results confirm that the chosen forcefields accurately model the water-hydrogen interactions.

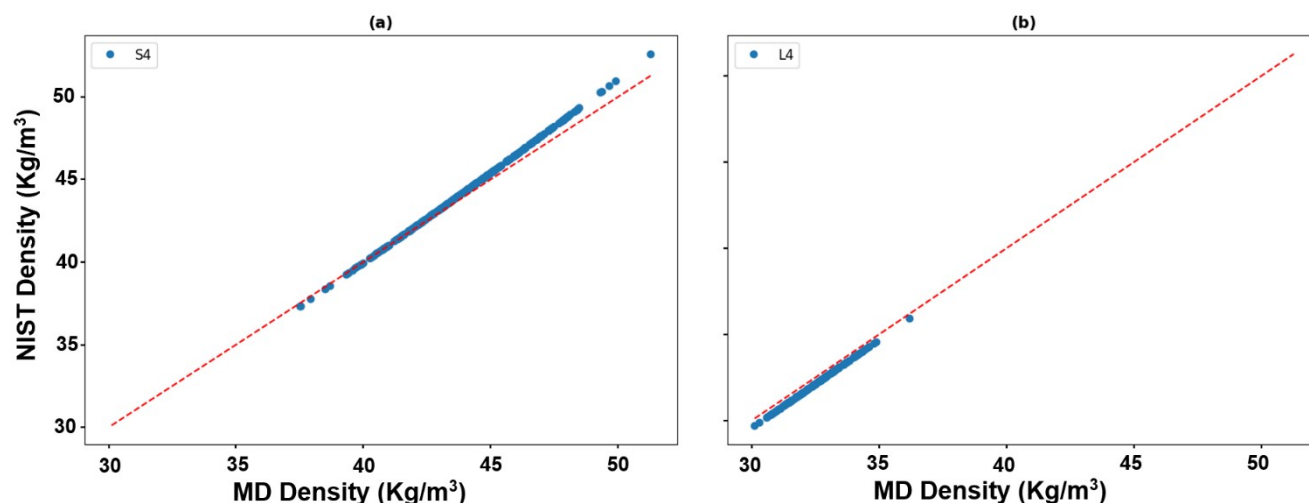

Figure S-1. Comparison of the hydrogen bubble mass density in water from MD results with NIST data for system (a) S4 and (b) L4.
